# Supplementary material for: Predicting Sensitivity to Adverse Lifestyle Risk Factors for Cardiometabolic Morbidity and Mortality
Source: Nutrients. 2022 Aug 1;14(15):3171. doi: 10.3390/nu14153171 (PMC9370461; doi:10.3390/nu14153171)
Supplement: Supplementary file 1 [file nutrients-14-03171-s001.zip › nutrients-1843386-supplementary.pdf]

## Supplementary material: Predicting sensitivity to adverse lifestyle risk factors for cardiometabolic morbidity and mortality.

### Supplementary tables

**Supplementary Table S1. VHU Criteria for exclusions on cardiometabolic traits**

|                                                                                                                                                                                                                                                                                                                                                                                                                                                                                                                                                                                                                                                                                                                                                                                                                                                                                                                                                                                                                                                                                                                    |
|--------------------------------------------------------------------------------------------------------------------------------------------------------------------------------------------------------------------------------------------------------------------------------------------------------------------------------------------------------------------------------------------------------------------------------------------------------------------------------------------------------------------------------------------------------------------------------------------------------------------------------------------------------------------------------------------------------------------------------------------------------------------------------------------------------------------------------------------------------------------------------------------------------------------------------------------------------------------------------------------------------------------------------------------------------------------------------------------------------------------|
| <ul style="list-style-type: none"> <li>• Height: &lt;130 cm or &gt;210 cm</li> <li>• Weight: &lt;35 kg</li> <li>• BMI: &lt;15 kg/m<sup>2</sup> or &gt;70 kg/m<sup>2</sup></li> <li>• Systolic blood pressure: &lt;20 or &gt;300</li> <li>• Diastolic blood pressure: &lt;20 or &gt;250</li> <li>• Total cholesterol: &lt;0.5 mmol/l or &gt;15 mmol/l</li> <li>• Triglycerides: &lt;0.15 mmol/l or &gt;20 mmol/l. Triglycerides values lower than 0.8 mmol/l were additionally excluded due to the sensitivity of the Reflotron benchtop analyser</li> <li>• HDL-cholesterol: &lt;0.15 mmol/l or &gt;7 mmol/l</li> <li>• LDL-cholesterol: Not defined. LDL cholesterol values lower than 0.5 mmol/l and higher than 13 mmol/l were excluded</li> <li>• Fasting glucose: &lt;1 mmol/l or &gt;25 mmol/l. Fasting glucose values lower than 2 mmol/l were additionally excluded as they were considered biologically implausible</li> <li>• *2hr glucose: &lt;1 mmol/l or &gt;35 mmol/l. 2hr glucose values lower than 2 mmol/l were additionally excluded as they were considered biologically implausible</li> </ul> |
| <p>* Not applied to MDCS dataset.</p> <p>Note: To convert cholesterol to mg/dl multiply by 38.67, blood glucose multiply by 18.0182, triglycerides multiply by 38.67</p>                                                                                                                                                                                                                                                                                                                                                                                                                                                                                                                                                                                                                                                                                                                                                                                                                                                                                                                                           |

**Supplementary Table S2. VHU Criteria for implausible values for lifestyle variables**

|                                                                                                                                                                                                                                                                                                                                                                                                                                                                                        |
|----------------------------------------------------------------------------------------------------------------------------------------------------------------------------------------------------------------------------------------------------------------------------------------------------------------------------------------------------------------------------------------------------------------------------------------------------------------------------------------|
| <p>Distance to work in kilometres (one way): All answers beyond 200 km were excluded</p> <p>Grams of tobacco smoked per week: All answers equal or beyond 350 gr/week were excluded</p> <p>Arachidonic acid (ARA) intake (g/day): All answers equal or beyond 0.9 gr/day were excluded</p> <p>Eicosapentaenoic acid (EPA) intake (g/day): All answers equal or beyond 2 gr/day were excluded</p> <p>Sodium intake (mg/day): All answers equal or beyond 10000 mg/day were excluded</p> |
|----------------------------------------------------------------------------------------------------------------------------------------------------------------------------------------------------------------------------------------------------------------------------------------------------------------------------------------------------------------------------------------------------------------------------------------------------------------------------------------|

**Supplementary Table S3. Variables removed during data processing.**

| Trait                                        | Variables: VHU                                                                                                                                                                                                                                                                                                      | Variables: MDC                                                                                           |
|----------------------------------------------|---------------------------------------------------------------------------------------------------------------------------------------------------------------------------------------------------------------------------------------------------------------------------------------------------------------------|----------------------------------------------------------------------------------------------------------|
| Fasting glucose                              | -                                                                                                                                                                                                                                                                                                                   | <i>gcehfn</i>                                                                                            |
| Diastolic blood pressure                     | <i>sm_duration.1; sm_duration.2; sbt.1;.2</i>                                                                                                                                                                                                                                                                       | <i>systolic</i>                                                                                          |
| 2hr glucose                                  | <i>ssn_time.1;sn_time.2 ;sm_status2.1 ;sm_status2.2</i>                                                                                                                                                                                                                                                             |                                                                                                          |
| High-density lipoprotein cholesterol (HDL-C) | -                                                                                                                                                                                                                                                                                                                   | <i>kole_s</i>                                                                                            |
| Low-density lipoprotein cholesterol (LDL-C)  | <i>FA160_sum1.1; FA160_sum1.2; MONOsum1.1; MONOsum1.2; mfetsum1.1; mfetsum1.2; FA140_sum1.1; FA140_sum1.2; fettsum1.1; fettsum1.2; FA170_sum1.1; FA170_sum1.2</i>                                                                                                                                                   | <i>f140_s</i>                                                                                            |
| Body mass index (BMI)                        | <i>sn_time.1;sn_time.2; sm_num_cig.1; sm_num_cig.2; FA226_sum1.1; FA226_sum1.2; karosum1.1; karosum1.2; kolhsum1.1; kolhsum1.2; protsum1_anim.1; protsum1_anim.2 ; sm_duration.1; sm_duration.2; fettsum1.1; fettsum1.2; Folasum1.1; Folasum1.2; MONOsum1.1; MONOsum1.2 ;FA160_sum1.1; FA160_sum1.2; kolesum1.1</i> | <i>gcehfn, gberrtf, rbapot, gpotdfri, rfrpotdi, rfrpoul, rbopoul, gfishm, rpifish, rcosandw,rwasandw</i> |
| Systolic blood pressure                      | <i>dbt.1; dbt.2</i>                                                                                                                                                                                                                                                                                                 | <i>diastolic</i>                                                                                         |
| Total cholesterol                            | <i>FA160_sum1.1;FA160_sum1.2; FA226_sum1.1; FA226_sum1.2; karosum1.1; karosum1.2; mfetsum1.1;mfetsum1.2; POLYsum1.1; POLYsum1.2;fettsum1.1; fettsum1.2; Folasum1.1; Folasum1.2; MONOsum1.1;</i>                                                                                                                     | <i>f140_s, f204_s</i>                                                                                    |

|               |                                                                                                                                                                                         |                                     |
|---------------|-----------------------------------------------------------------------------------------------------------------------------------------------------------------------------------------|-------------------------------------|
|               | <i>MONOsum1.2;</i><br><i>NATRsum1.1</i><br><i>;NATRsum1.2; NIACsum1.1;</i><br><i>NIACsum1.2;</i><br><i>sm_duration.1; sm_duration.2</i>                                                 |                                     |
| Triglycerides | <i>sn_time.1;      sn_time.2;</i><br><i>karosum1.1;karosum1.2;</i><br><br><i>MONOsum1.1;</i><br><i>MONOsum1.2;      sm_cig_groups.1;</i><br><i>sm_cig_groups.2;      sm_duration.1;</i> | <i>gmarglf1, gmarglf2, gmarglf3</i> |

| Trait               | Variables: VHU                                                    | Variables: MDC |
|---------------------|-------------------------------------------------------------------|----------------|
|                     | <i>sm_duration.2;</i> <i>FA226_sum1.1;</i><br><i>FA226_sum1.2</i> |                |
| (-): Not applicable |                                                                   |                |

**Supplementary Table S4. VHU variable meaning**

| VHU Variable     | Meaning (units)                                                                                                                        |
|------------------|----------------------------------------------------------------------------------------------------------------------------------------|
| livskvalitet_d9  | Fitness status                                                                                                                         |
| sf_3f            | Physical limitation to participate in moderately demanding activities: bending down or kneeling                                        |
| sf_3d            | Physical limitation to participate in moderately demanding activities: walking up several stairs                                       |
| sf_3a            | Physical limitation to participate in strenuous activities: running, lifting heavy objects, taking part in physically demanding sports |
| sf_1             | Self-rate of overall health                                                                                                            |
| g5               | Everyday exercise satisfaction                                                                                                         |
| sf_3g            | Physical limitation to participate in moderately demanding activities: walking more than 2 km                                          |
| sf_11d           | Excellent health                                                                                                                       |
| halsoar          | Overall state of health during the last year                                                                                           |
| beskbltr         | Informed of having high blood pressure                                                                                                 |
| g6               | Exercise during the last three months                                                                                                  |
| livskvalitet_d12 | Energy status                                                                                                                          |
| sf_3e            | Physical limitation to participate in moderately demanding activities: walking up one flight of stairs                                 |
| halsojf          | Overall state of health compared to other your age                                                                                     |
| sf_7             | Pain during the last four weeks                                                                                                        |
| sf_3b            | Physical limitation to participate in moderately demanding activities: moving a table, vacuuming, walking in the forest or gardening   |
| sf_8             | How much has the pain during the last four weeks disturbed your normal work?                                                           |
| pa_index_miss    | Cambridge physical activity index                                                                                                      |
| g1_3             | Cycle to work vs passive travel to work                                                                                                |
| sf_11b           | As healthy as anyone                                                                                                                   |
| sf_9a            | For how much of the time during the last four weeks have you felt really alert and strong?                                             |
| sf_3h            | Physical limitation to participate in moderately demanding activities: walking more than a few hundred meters                          |
| sf_4b            | Physical limitation that made you do less than you wanted during the last four weeks                                                   |
| kottport         | Average portion size of meat/fish                                                                                                      |
| sf_9g            | For how much of the time during the last four weeks have you felt worn out?                                                            |
| sf_9e            | For how much of the time during the last four weeks have you felt Full of energy?                                                      |
| protsum1_anim    | Animal based protein intake (g/day)                                                                                                    |
| potport          | Average portion size of potatoes/rice/pasta                                                                                            |

| VHU Variable          | Meaning (units)                                                                                                               |
|-----------------------|-------------------------------------------------------------------------------------------------------------------------------|
| gramnew47             | Sausage as main dish                                                                                                          |
| sf_3j                 | Physical limitation to participate in moderately demanding activities: bathing or getting dressed                             |
| Lig_Secsum1           | Secoisolariciresinol intake (µg/day)                                                                                          |
| FA204_sum1            | Arachidonic acid (ARA) intake (g/day)                                                                                         |
| sf_4c                 | Physical limitation that made you not being able to perform certain work tasks or other activities during the last four weeks |
| sf_9i                 | For how much of the time during the last four weeks have you felt tired?                                                      |
| NIACsum1              | Vitamin B3 intake (mg/day)                                                                                                    |
| Lig4sumsum1           | Sum of Lariciresinol, Matairesinol, Pinoresinol, Secoisolariciresinol intake (µg/day)                                         |
| sf_11a                | Get sick more often than other people                                                                                         |
| sf_3i                 | Physical limitation to participate in moderately demanding activities: walking a hundred meters                               |
| fibesum1              | Fibre intake (g/day)                                                                                                          |
| sf_4d                 | Physical limitation that limited your ability to perform certain work tasks or other activities during the last four weeks    |
| diab_foraldrar_syskon | Parents or siblings have diabetes                                                                                             |
| NATRsum1              | Sodium intake (mg/day)                                                                                                        |
| g3_a                  | Frequency of walking during leisure time                                                                                      |
| g3_b                  | Frequency of cycling during leisure time                                                                                      |
| gramnew65             | Sodas, soft drinks, juice                                                                                                     |
| gramnew43             | Minced meat dishes                                                                                                            |
| sjukskriven           | Long-term sickness                                                                                                            |
| g4                    | Changed every day exercise during the last year                                                                               |
| Lig_Pinsum1           | Pinoresinol intake (µg/day)                                                                                                   |
| Folasum1              | Folate (µg/day)                                                                                                               |
| gramnew46             | Bacon                                                                                                                         |
| Lig_Larsum1           | Lariciresinol intake (µg/day)                                                                                                 |
| gramnew34             | Fried potatoes, pommes frites                                                                                                 |
| Dsum1                 | Vitamin D intake (µg/day)                                                                                                     |
| g7                    | If you exercise, change in exercise habits during the last year                                                               |
| sf_3c                 | Physical limitation to participate in moderately demanding activities: lifting or carrying grocery bags                       |
| scorning              | Participation in sports or physical exercise associations                                                                     |

| VHU Variable | Meaning (units)                                                                                                                                       |
|--------------|-------------------------------------------------------------------------------------------------------------------------------------------------------|
| protsum1     | Total protein intake (g/day)                                                                                                                          |
| utbild       | Educational level                                                                                                                                     |
| sf_11c       | Worsen health in the future                                                                                                                           |
| 11_4         | Porridge w/o sandwich for breakfast vs does not breakfast at all                                                                                      |
| MONOsum1     | Monounsaturated fat intake (g/day)                                                                                                                    |
| MOSAsum1     | Monosaccharides intake (g/day)                                                                                                                        |
| gramnew45    | Steak, chop, e.g.,                                                                                                                                    |
| gramnew8     | Salad dressing with oil                                                                                                                               |
| sf_6         | Extent to what your physical and emotional health disrupted your usual social life during the last four weeks                                         |
| 11_5         | Gruel w/o sandwich for breakfast vs does not breakfast at all                                                                                         |
| gramnew48    | Hamburger                                                                                                                                             |
| gramnew67    | Boiled coffee                                                                                                                                         |
| kolesum1     | Cholesterol intake (g/day)                                                                                                                            |
| Lig_Matsum1  | Matairesinol intake ( $\mu\text{g/day}$ )                                                                                                             |
| sm_status2   | Former smokers vs non-smokers                                                                                                                         |
| sf_10        | For how much of the time during the last four weeks has your physical health or your emotional problems limited your ability to interact with others? |
| gramnew44    | Meat stew                                                                                                                                             |
| gramnew62    | Low fat milk (0.5%)                                                                                                                                   |
| 11_3         | Sour milk, cereals, w/o sandwich for breakfast vs does not breakfast at all                                                                           |
| sf_5b        | Emotional problems that made you do less than you wanted during the last four weeks                                                                   |
| ansttyp_a    | Permanent employment                                                                                                                                  |
| gramnew18    | Sausage, liver pâté on bread                                                                                                                          |
| gramnew72    | Wine                                                                                                                                                  |
| FULLKsum1    | Whole grain intake (g/day)                                                                                                                            |
| sf_4a        | Physical limitation that reduced the normal time spent at work or in other activities during the last four weeks                                      |
| gramnew41    | Pancake, waffle, Swedish dumpling                                                                                                                     |
| protsum1_veg | Plant based protein intake (g/day)                                                                                                                    |
| Lig_Sumsum1  | Sum of all lignans intake ( $\mu\text{g/day}$ )                                                                                                       |
| kolhsum1     | Carbohydrates intake (g/day)                                                                                                                          |

| VHU Variable    | Meaning (units)                                                                                                        |
|-----------------|------------------------------------------------------------------------------------------------------------------------|
| Bstrsum1        | Beta-sitosterol intake (mg/day)                                                                                        |
| ansttyp_g       | Retirement pensioner full-time                                                                                         |
| g3_f            | Frequency of hunting or fishing during leisure time                                                                    |
| B12sum1         | Vitamin B12 intake (µg/day)                                                                                            |
| sacksum1        | Sucrose intake (g/day)                                                                                                 |
| gramnew31       | White cabbage, lettuce, lettuce cabbage, spinach, borecole                                                             |
| livskvalitet_d5 | Satisfaction with leisure time                                                                                         |
| askosum1        | Vitamin C intake (mg/day)                                                                                              |
| gramnew42       | Pizza                                                                                                                  |
| l5a             | Eat breakfast                                                                                                          |
| Tstrsum1        | Sum of phytosterols intake (mg/day)                                                                                    |
| g3_g            | Frequency of picking berries or mushrooms during leisure time                                                          |
| FA160_sum1      | Palmitic acid intake (g/day)                                                                                           |
| selesum1        | Selenium intake (µg/day)                                                                                               |
| Sstrsum1        | Stigmasterol intake (mg/day)                                                                                           |
| socforening_e   | Participation in other association                                                                                     |
| gramnew6        | Margarine for cooking                                                                                                  |
| gramnew24       | Fibre cereals                                                                                                          |
| gramnew30       | Tomato, cucumber                                                                                                       |
| Lig_Equsum1     | Equol intake (µg/day)                                                                                                  |
| alkosum1        | Alcohol intake (g/day)                                                                                                 |
| gramnew3        | Low fat margarine on bread                                                                                             |
| karosum1        | beta-carotene intake (mg/day)                                                                                          |
| g3_c            | Frequency of dancing during leisure time                                                                               |
| sf_5c           | Emotional problems that made you do be less thorough than usual in work or other activities during the last four weeks |
| fettsum1        | Total fat intake (g/day)                                                                                               |
| gramnew68       | Tea                                                                                                                    |
| MAGNsum1        | Magnesium intake (mg/day)                                                                                              |
| sf_2            | Self-rate of overall health compared to a year ago                                                                     |

| VHU Variable     | Meaning (units)                                                                                                 |
|------------------|-----------------------------------------------------------------------------------------------------------------|
| arbtala          | Possibility to speak with colleagues during breaks                                                              |
| gramnew73        | Liquor, spirits                                                                                                 |
| sn_quantity      | Number of snuff boxes per week                                                                                  |
| sf_5a            | Emotional problems that reduced the normal time spent at work or in other activities during the last four weeks |
| B6sum1           | Vitamin B6 intake (mg/day)                                                                                      |
| gramnew29        | Root vegetable tables, carrot                                                                                   |
| sf_9h            | For how much of the time during the last four weeks have you felt happy?                                        |
| g2_c             | Light and physically active work                                                                                |
| gramnew66        | Brewed (filtered) coffee                                                                                        |
| sf_9c            | For how much of the time during the last four weeks have you felt so depressed that nothing could cheer you up? |
| livskvalitet_d10 | Appetite status                                                                                                 |
| sm_num_cig       | Number of cigarettes smoked per day                                                                             |
| gramnew26        | Berries (fresh or frozen)                                                                                       |
| g1_2             | Walk to work vs passive travel to work                                                                          |
| gramnew33        | Boiled or baked potato                                                                                          |
| FA205_sum1       | Eicosapentaenoic acid (EPA) intake (g/day)                                                                      |
| sn_time          | Years using snuff                                                                                               |
| sf_9f            | For how much of the time during the last four weeks have you felt gloomy and sad?                               |
| sm_duration      | Years smoking                                                                                                   |
| g2_a             | Sedentary or standing work                                                                                      |
| FA226_sum1       | Docosahexaenoic acid (DHA) intake (g/day)                                                                       |
| 11_2             | Coffee/tea and wheat buns or rusk for breakfast vs does not breakfast at all                                    |
| gronport         | Average portion size of vegetables                                                                              |
| gramnew7         | Oil for cooking                                                                                                 |
| gramnew12        | White (soft) bread, thin crisp bread                                                                            |
| civil3           | Marital status: Single vs Divorced/separated                                                                    |
| Lig_Syrsum1      | Syringaresinol intake ( $\mu$ g/day)                                                                            |
| 12               | Eat lunch                                                                                                       |
| skiftarbete      | Work shifts/weekends                                                                                            |

| VHU Variable     | Meaning (units)                                                                    |
|------------------|------------------------------------------------------------------------------------|
| gramnew64        | Milk, sour milk (3%)                                                               |
| socforening_b    | Participation in study circles                                                     |
| j10              | Suggestions that you drink less                                                    |
| ansttyp_h        | Retirement pensioner part-time                                                     |
| l5b              | Eat lunch                                                                          |
| l1_1             | Coffee/tea and sandwich for breakfast vs does not breakfast at all                 |
| g9               | Amount of exercise during the last 12 months                                       |
| gramnew69        | Light beer                                                                         |
| sf_9d            | For how much of the time during the last four weeks have you felt calm and serene? |
| gramnew55        | Salty fish                                                                         |
| gramnew38        | Pasta                                                                              |
| gramnew20        | Oatflake, whole wheat, rye or barley porridge                                      |
| gramnew22        | Sour milk, yoghurt (3% fat)                                                        |
| g10              | Time spent in a week in moderately strenuous activities                            |
| sn_status2       | Former snuff users vs non-snuff users                                              |
| FA170_sum1       | Heptadecanoic acid intake (g/day)                                                  |
| livskvalitet_d13 | Patience status                                                                    |
| ansttyp_d        | Unemployment                                                                       |
| ZINCsum1         | Zinc intake (mg/day)                                                               |
| Cstnsum1         | Campestanol intake (mg/day)                                                        |
| j2               | Amount of alcohol drunk in a day                                                   |
| arbfort          | Job demands to work very fast                                                      |
| gramnew32        | Mixed frozen vegetables                                                            |
| gramnew70        | Medium beer                                                                        |
| gramnew16        | Soft cheese                                                                        |
| Bstnsum1         | Beta-sitostanol intake (mg/day)                                                    |
| gramnew35        | Mashed potato                                                                      |
| j3               | Frequency of drinking six or more glasses at the same occasion                     |
| retisum1         | Vitamin A intake (mg/day)                                                          |

| VHU Variable              | Meaning (units)                                                                                                                       |
|---------------------------|---------------------------------------------------------------------------------------------------------------------------------------|
| antal_km                  | Distance to work in kilometres (one way)                                                                                              |
| sleep_h8a                 | Snore during sleep                                                                                                                    |
| j1                        | Frequency of alcohol consumption                                                                                                      |
| hjärtinf_foraldrar_syskon | Parents or siblings had a cerebral haemorrhage/thrombosis or cardiac infarction before the age of 60                                  |
| gramnew59                 | Sugar, honey, marmalade, jam                                                                                                          |
| livskvalitet_d6           | Hearing status                                                                                                                        |
| mfetsum1                  | Saturated fat intake (g/day)                                                                                                          |
| g1_4                      | Irregular travel mode to work vs passive travel to work                                                                               |
| livskvalitet_d15          | Sleep status                                                                                                                          |
| sleep_h7b                 | Risk of sleeping while watching TV                                                                                                    |
| gramnew23                 | Sour milk, yoghurt (low fat)                                                                                                          |
| livskvalitet_d4           | Satisfaction with economy                                                                                                             |
| j8                        | Times during last year that you drink so much that you were not able to remember what you did                                         |
| gramnew40                 | Blota (broth + bread)                                                                                                                 |
| arbkontakt                | Frequent social contacts with colleagues during work                                                                                  |
| livskvalitet_d3           | Satisfaction with work situation                                                                                                      |
| FA150_sum1                | Pentadecanoic acid intake (g/day)                                                                                                     |
| gramnew25                 | Corn flakes                                                                                                                           |
| DISAsum1                  | Disaccharide intake (g/day)                                                                                                           |
| soclago                   | Would you say that the number of people that you meet in your everyday life is enough or would you like to meet more or fewer people? |
| arbrut                    | Repetitive job                                                                                                                        |
| sm_gr_tobacco             | Grams of tobacco smoked per week                                                                                                      |
| soctrost                  | Receive hugs to comfort and support you                                                                                               |
| gramnew61                 | Chips, popcorn, salted nuts                                                                                                           |
| FOSFsum1                  | Phosphate intake (mg/day)                                                                                                             |
| livskvalitet_d11          | Mood status                                                                                                                           |
| gramnew27                 | Apple, pear, peach, orange, mandarin and grapefruit                                                                                   |
| gramnew17                 | Soft whey cheese                                                                                                                      |
| Lig_Endsum1               | Enterodiol intake (µg/day)                                                                                                            |

| VHU Variable        | Meaning (units)                                                                       |
|---------------------|---------------------------------------------------------------------------------------|
| gramnew9            | Cream, creme fraiche, sour cream                                                      |
| sleep_h7g           | Risk of sleeping while sitting still after having lunch                               |
| jernsum1            | Iron intake (mg/day)                                                                  |
| gramnew60           | Cookies, pastry                                                                       |
| gramnew28           | Banana                                                                                |
| Lig_Medsum1         | Medioresinol intake ( $\mu\text{g/day}$ )                                             |
| sleep_h7f           | Risk of sleeping while sitting and talking with someone                               |
| gramnew58           | Sweets                                                                                |
| sleep_h7c           | Risk of sleeping while sitting inactive in a public place                             |
| j6                  | Times during last year that you felt you needed a drink after drinking the day before |
| gramnew19           | Meat on bread                                                                         |
| gramnew2            | Butter on bread                                                                       |
| sn_status1          | Snuff user vs non-snuff user                                                          |
| socsam              | Number of social interactions during a normal week                                    |
| l3                  | Eat dinner                                                                            |
| gramnew49           | White meat (poultry)                                                                  |
| socstod             | Support from others                                                                   |
| B2sum1              | Vitamin B2 intake ( $\mu\text{g/day}$ )                                               |
| g3_e                | Frequency of gardening during leisure time                                            |
| livskvalitet_d1     | Satisfaction with home and family situation                                           |
| l1_0                | Only coffee/tea for breakfast vs does not breakfast at all                            |
| TRANSsum1           | Trans fat intake (g/day)                                                              |
| JODIsum1            | Iodine intake ( $\mu\text{g/day}$ )                                                   |
| Lig_Enlsum1         | Enterolactone intake ( $\mu\text{g/day}$ )                                            |
| sambo2              | Cohabitation: Live alone vs Only children                                             |
| graviditetsdiabetes | Had gestational diabetes                                                              |
| sochem              | Number of friends that can come to your home at any time and feel at home             |
| socdelta            | Participation in associations or voluntary organizations                              |
| sleep_h7e           | Risk of sleeping while lying down resting in the afternoon                            |

| VHU Variable     | Meaning (units)                                                     |
|------------------|---------------------------------------------------------------------|
| livskvalitet_d14 | Confidence status                                                   |
| i1               | Teetotaler                                                          |
| j4               | Times during last year that you felt inability to stop drinking     |
| gramnew63        | Milk, sour milk (1,5%)                                              |
| gramnew56        | Smoked fish/meat                                                    |
| ensum1           | Total energy intake (kcal/day)                                      |
| POLYsum1         | Polyunsaturated fat intake (g/day)                                  |
| sleep_h7h        | Risk of sleeping in a car which has stopped for a few minutes       |
| Cstrsum1         | Campesterol intake (mg/day)                                         |
| gramnew5         | Butter for cooking                                                  |
| socupps          | Appreciation of the ones at home or others                          |
| livskvalitet_d16 | Do you feel important and appreciated outside your home?            |
| livskvalitet_d2  | Satisfaction with accommodation                                     |
| arbski           | Skill demand from job                                               |
| gramnew14        | Cheese 28%                                                          |
| sleep_h7a        | Risk of sleeping while sitting and reading                          |
| FA140_sum1       | Formic acid intake (g/day)                                          |
| sleep_h7d        | Risk of sleeping as a passenger in a car for one hour without break |
| ansttyp_c        | Work at home                                                        |
| FA182_sum1       | Linoleic acid intake (g/day)                                        |
| arbvad           | Control over own work assignment                                    |
| gramnew10        | Whole grain crisp bread                                             |
| gramnew15        | Cheese 10-17%                                                       |
| g2_b             | Light but partly physically active work                             |
| gramnew4         | Margarine on bread                                                  |
| i3               | Receive critics about your alcohol consumption                      |
| sambo1           | Cohabitation: Live alone vs Only one adult (spouse, partner)        |
| ansttyp_f        | Self-employed                                                       |
| livskvalitet_d17 | Do you feel important and appreciated in your home?                 |

| VHU Variable  | Meaning (units)                                                                 |
|---------------|---------------------------------------------------------------------------------|
| arbhin        | Enough time for job assignments                                                 |
| i2            | Feel the need to reduce alcohol consumption                                     |
| i4            | Feel uneasy or guilty because of your way of drinking                           |
| socforening_d | Participation in choir                                                          |
| gramnew52     | Lean fish (e.g., perch, bass, cod)                                              |
| gramnew13     | Coffee rolls/buns, rusk                                                         |
| gramnew1      | Bregott on bread                                                                |
| arbpsyk       | High mental demand from job                                                     |
| j7            | Times during last year that you felt guilty because of your drinking            |
| i5            | Drunk alcohol first thing in the morning                                        |
| TIAMsum1      | Tiamin intake (mg/day)                                                          |
| arbhur        | Control over planning and execution of the workday                              |
| j9            | Hurt people because of your drinking                                            |
| arbnytt       | Learn new things at job                                                         |
| gramnew37     | Rice                                                                            |
| soclaana      | People to ask for favours from                                                  |
| soctala       | Number of people with whom you can speak openly                                 |
| sm_status5    | Former occasional smoker vs non-smoker                                          |
| gramnew51     | Liver, kidney                                                                   |
| kalcsu1       | Calcium intake (mg/day)                                                         |
| sm_status1    | Smoker vs non-smoker                                                            |
| gramnew71     | Strong beer                                                                     |
| sambo4        | Cohabitation: Live alone vs Other/others                                        |
| gramnew50     | Blood based food                                                                |
| socforening_c | Participation in theatre group                                                  |
| gramnew39     | Brown beans, pea soup                                                           |
| sockont       | Number of social contacts with the same interests as you                        |
| sf_9b         | For how much of the time during the last four weeks have you felt very nervous? |
| gramnew21     | Rosehip, sweet syrup soup                                                       |

| VHU Variable    | Meaning (units)                                                         |
|-----------------|-------------------------------------------------------------------------|
| l5c             | Eat dinner                                                              |
| ansttyp_e       | Student                                                                 |
| gramnew57       | Ice cream                                                               |
| arbfritid       | Frequency of social contacts with colleagues during leisure time        |
| civil4          | Marital status: Single vs Widow/widower                                 |
| arbfys          | High physical demand from job                                           |
| socanfo         | Person to confide in                                                    |
| sambo3          | Cohabitation: Live alone vs Adult and children                          |
| j5              | Times during last year that something was not done due to your drinking |
| KALIsu1         | Potassium intake (mg/day)                                               |
| socnara         | Close relationship with anyone                                          |
| socofta         | Frequency of engaging in clubs, associations or study circles           |
| gramnew53       | Fatty fish (e.g. herring, whitefish, salmon)                            |
| g2_e            | Physically straining work most of the time                              |
| gramnew54       | Shellfish (e.g. shrimps, scallops)                                      |
| arblamna        | Possibility to leave your work for a while to speak with a colleague    |
| tokosum1        | Vitamin E intake (mg/day)                                               |
| ansttyp_b       | Temporary employment                                                    |
| gramnew36       | Potato salad                                                            |
| g3_d            | Frequency of shovelling snow during leisure time                        |
| sochelp         | People to ask for help apart from the ones at home                      |
| sm_cig_groups   | Number of cigarettes smoked per day (in groups)                         |
| soclyck         | Special person to share feelings                                        |
| g2_d            | Sometimes physically straining work                                     |
| arbkrav         | Contradictory demands in job                                            |
| arbbesok        | Last time a colleague visited you at home                               |
| livskvalitet_d7 | Vision status                                                           |
| sm_num_cigar    | Number of cigars smoked per day                                         |
| gramnew11       | Whole grain soft bread                                                  |

| VHU Variable    | Meaning (units)                           |
|-----------------|-------------------------------------------|
| sm_status4      | Occasional smoker vs non-smoker           |
| FA183_sum1      | Linolenic acid intake (g/day)             |
| arbide          | Ingenuity or creativity demand from job   |
| livskvalitet_d8 | Memory status                             |
| civil2          | Marital status: Single vs Married/partner |
| sleep_h8b       | Breath-holds during sleep                 |
| ansttyp_i       | Retirement pensioner unspecified          |

**Supplementary Table S5. Rank-ordered most important variables among 9 cardiometabolic traits in VHU.**

| Variable                                               | BMI | HDL-C | LDL-C | TC | TG | SBP | DBP | FG | 2hr G | score |
|--------------------------------------------------------|-----|-------|-------|----|----|-----|-----|----|-------|-------|
| Training or exercising during the last 3 months        | 1   | 1     | 1     | 1  | 1  | 0   | 1   | 1  | 1     | 8     |
| Portion size of green vegetables                       | 1   | 1     | 0     | 1  | 1  | 0   | 1   | 1  | 1     | 7     |
| State of health during the last year                   | 1   | 1     | 0     | 0  | 1  | 1   | 1   | 1  | 1     | 7     |
| Number of cigarettes smoked per day (in groups)        | 1   | 1     | 0     | 1  | 0  | 1   | 1   | 1  | 1     | 7     |
| Smokers vs non-smokers                                 | 0   | 1     | 0     | 1  | 1  | 1   | 1   | 1  | 1     | 7     |
| Cycle to work vs passive travel to work                | 1   | 1     | 0     | 1  | 1  | 1   | 0   | 0  | 1     | 6     |
| Frequency of cycling during leisure time               | 1   | 1     | 0     | 1  | 1  | 0   | 0   | 0  | 1     | 5     |
| Brewed (filtered) coffee                               | 1   | 0     | 0     | 0  | 1  | 1   | 1   | 0  | 1     | 5     |
| Sodas, soft drinks, juice                              | 1   | 0     | 1     | 1  | 1  | 0   | 0   | 0  | 1     | 5     |
| Portion size of meat/fish                              | 1   | 0     | 1     | 1  | 0  | 1   | 0   | 0  | 1     | 5     |
| Monosaccharide intake                                  | 1   | 0     | 0     | 1  | 1  | 0   | 0   | 1  | 1     | 5     |
| Plant protein intake                                   | 1   | 0     | 1     | 1  | 1  | 0   | 0   | 1  | 0     | 5     |
| Former smokers vs non-smokers                          | 1   | 0     | 0     | 0  | 1  | 1   | 1   | 1  | 0     | 5     |
| Snuff users vs non-snuff users                         | 0   | 1     | 0     | 0  | 1  | 1   | 1   | 0  | 1     | 5     |
| Participation in associations, voluntary organizations | 0   | 0     | 0     | 0  | 1  | 1   | 1   | 1  | 1     | 5     |

HDL-C: High-density lipoprotein cholesterol; LDL-C: low-density lipoprotein cholesterol; HbA1c: Glycated haemoglobin; 2hr G: 2h glucose tolerance; FG: Fasting glucose; TG: Triglycerides; TC: Total cholesterol, SBP: Systolic blood pressure; DBP: Diastolic blood pressure.

Supplementary Table S6. AUCs for each trait in VHU.

| FRS non-laboratory-based | FRS non-laboratory-based + Sensitivity status | FRS laboratory-based risk score | FRS laboratory-based risk score + Sensitivity status | ACC/AHA risk score | ACC/AHA risk score + Sensitivity status |
|--------------------------|-----------------------------------------------|---------------------------------|------------------------------------------------------|--------------------|-----------------------------------------|
| Total cholesterol        |                                               |                                 |                                                      |                    |                                         |
| 0.72                     | 0.73                                          | -                               | -                                                    | -                  | -                                       |
| SBP                      |                                               |                                 |                                                      |                    |                                         |
| 0.73                     | 0.74                                          | -                               | -                                                    | -                  | -                                       |
| DBP                      |                                               |                                 |                                                      |                    |                                         |
| 0.73                     | 0.73                                          | -                               | -                                                    | -                  | -                                       |
| LDL-C                    |                                               |                                 |                                                      |                    |                                         |
| 0.71                     | 0.76                                          | 0.72                            | 0.75                                                 | 0.74               | 0.76                                    |
| HDL-C                    |                                               |                                 |                                                      |                    |                                         |
| 0.69                     | 0.62                                          | 0.67                            | 0.63                                                 | 0.70               | 0.68                                    |
| BMI                      |                                               |                                 |                                                      |                    |                                         |
| 0.73                     | 0.74                                          | 0.71                            | 0.73                                                 | 0.73               | 0.74                                    |
| 2h glucose               |                                               |                                 |                                                      |                    |                                         |
| 0.73                     | 0.74                                          | 0.70                            | 0.71                                                 | 0.71               | 0.71                                    |
| Fasting glucose          |                                               |                                 |                                                      |                    |                                         |
| 0.73                     | 0.73                                          | 0.71                            | 0.73                                                 | 0.72               | 0.72                                    |
| Triglycerides            |                                               |                                 |                                                      |                    |                                         |
| 0.70                     | 0.69                                          | -                               | -                                                    | -                  | -                                       |

" - " it was not possible to estimate the number; HDL-C: High-density lipoprotein cholesterol; LDL-C: low-density lipoprotein cholesterol; FG: Fasting glucose; SBP: Systolic blood pressure; DBP: Diastolic blood pressure; FRS: Framingham risk score; ACC/AHA: American College of Cardiology/American Heart Association.

Supplementary Table S7. R packages used for the analyses in the current study.

| Step                                 | R Package                            | Version      |
|--------------------------------------|--------------------------------------|--------------|
| Variable processing                  | <i>caret</i>                         | 6.0-90       |
| Missing data imputation              | <i>missForest</i>                    | 1.4          |
| Multicollinearity                    | <i>car</i>                           | 3.0-12       |
| Performance and model assumption     | <i>Performance</i>                   | 0.8.0        |
| Quantile regression modelling        | <i>quantreg</i>                      | 5.88         |
| Quantile regression forest modelling | <i>quantregForest ; randomForest</i> | 1.3-7; 4.7-1 |
| Cox modelling                        | <i>Survival</i>                      | 3.2-13       |
| Cox proportional assumption          | <i>Rms</i>                           | 6.2-0        |
| Incidence rate ratio                 | <i>fmsb</i>                          | 0.7.2        |
| Meta-analysis                        | <i>Meta</i>                          | 5.2-         |

Supplementary Table S8. Hazard ratios and 95%CI of prediction interval categories and clinical outcomes

| CVD             |               |       |        |               |      |           |      |          | T2D   |        |               |      |           |      |      | CVD-mortality |        |               |      |           |      |      |
|-----------------|---------------|-------|--------|---------------|------|-----------|------|----------|-------|--------|---------------|------|-----------|------|------|---------------|--------|---------------|------|-----------|------|------|
| Trait/study     | Categories    | n     | Events | *Person-years | HR   | 95% (CIs) |      | p        | n     | Events | *Person-years | HR   | 95% (CIs) |      | p    | n             | Events | *Person-years | HR   | 95% (CIs) |      | p    |
| Fasting glucose |               |       |        |               |      |           |      |          |       |        |               |      |           |      |      |               |        |               |      |           |      |      |
| VHU             | Ref (Neutral) | 13596 | 446    | 10854,5       | 1,00 |           |      |          | 13566 | 186    | 10838,4       | 1,00 |           |      |      | 13596         | 31     | 10854,5       | 1,00 |           |      |      |
|                 | Resilient     | 261   | 11     | 193,1         | 1,21 | 0,82      | 1,80 | 0,34     | 574   | 8      | 485,1         | 0,73 | 0,18      | 2,97 | 0,67 | 261           | 0      | 193,1         | -    | -         | -    | -    |
|                 | Sensitive     | 576   | 26     | 486,5         | 1,54 | 0,85      | 2,81 | 0,16     | 261   | 2      | 193,1         | 0,83 | 0,41      | 1,68 | 0,60 | 576           | 2      | 486,5         | 1,31 | 0,31      | 5,51 | 0,71 |
| MDC             | Ref (Neutral) | 1537  | 345    | 94,2          | 1,00 |           |      |          | 996   | 106    | 65,3          | 1,00 |           |      |      | 1538          | 243    | 97,5          | 1,00 |           |      |      |
|                 | Resilient     | 70    | 9      | 4,7           | 0,48 | 0,25      | 0,94 | 3,28E-02 | 52    | 3      | 3,7           | 0,47 | 0,15      | 1,48 | 0,20 | 70            | 13     | 4,7           | 1,00 | 0,57      | 1,75 | 0,99 |

| CVD                  |               |       |        |               |      |           |      |                 | T2D   |        |               |      |           |       |                | CVD-mortality |        |               |      |           |       |              |
|----------------------|---------------|-------|--------|---------------|------|-----------|------|-----------------|-------|--------|---------------|------|-----------|-------|----------------|---------------|--------|---------------|------|-----------|-------|--------------|
| Trait/study          | Categories    | n     | Events | *Person-years | HR   | 95% (CIs) |      | p               | n     | Events | *Person-years | HR   | 95% (CIs) |       | p              | n             | Events | *Person-years | HR   | 95% (CIs) |       | p            |
|                      | Sensitive     | 66    | 15     | 4,1           | 1,01 | 0,60      | 1,70 | 0,96            | 32    | 6      | 1,2           | 4,81 | 2,08      | 11,12 | <b>2,4E-04</b> | 79            | 14     | 4,7           | 1,18 | 0,69      | 2,03  | 0,54         |
| 2-h Glucose† / HbA1c |               |       |        |               |      |           |      |                 |       |        |               |      |           |       |                |               |        |               |      |           |       |              |
| VHU †                | Ref (Neutral) | 12233 | 392    | 10063,7       | 1,00 |           |      |                 | 12210 | 110    | 10049,4       | 1,00 |           |       |                | 12233         | 23     | 10063,7       | 1,00 |           |       |              |
|                      | Resilient     | 535   | 16     | 457,9         | 0,77 | 0,47      | 1,27 | 0,31            | 535   | 8      | 457,9         | 1,42 | 0,69      | 2,91  | 0,34           | 535           | 0      | 457,9         | -    | -         | -     | -            |
|                      | Sensitive     | 192   | 6      | 160,3         | 1,33 | 0,59      | 2,98 | 0,49            | 192   | 2      | 160,3         | 1,46 | 0,36      | 5,94  | 0,59           | 192           | 0      | 160,3         | -    | -         | -     | -            |
| MDC                  | Ref (Neutral) | 1524  | 323    | 93,9          | 1,00 |           |      |                 | 1018  | 110    | 66,4          | 1,00 |           |       |                | 1512          | 233    | 96,2          | 1,00 |           |       |              |
|                      | Resilient     | 71    | 14     | 4,3           | 0,78 | 0,45      | 1,33 | 0,36            | 48    | 1      | 3,3           | 0,18 | 0,02      | 1,28  | 0,09           | 73            | 9      | 4,6           | 0,75 | 0,38      | 1,47  | 0,40         |
|                      | Sensitive     | 69    | 21     | 3,9           | 1,51 | 0,96      | 2,36 | 0,07            | 30    | 2      | 1,3           | 1,03 | 0,25      | 4,20  | 0,96           | 79            | 12     | 4,6           | 1,11 | 0,62      | 2,00  | 0,72         |
| DBP                  |               |       |        |               |      |           |      |                 |       |        |               |      |           |       |                |               |        |               |      |           |       |              |
| VHU                  | Ref (Neutral) | 13127 | 429    | 10873,5       | 1,00 |           |      |                 | 13094 | 175    | 10851,3       | 1,00 |           |       |                | 13127         | 33     | 10873,5       | 1,00 |           |       |              |
|                      | Resilient     | 456   | 6      | 374,1         | 0,39 | 0,17      | 0,87 | <b>2,10E-02</b> | 456   | 4      | 374,1         | 0,94 | 0,39      | 2,28  | 0,89           | 456           | 0      | 374,1         | -    | -         | -     | -            |
|                      | Sensitive     | 252   | 19     | 202,6         | 2,25 | 1,49      | 3,40 | <b>1,05E-04</b> | 251   | 3      | 201,7         | 0,78 | 0,25      | 2,44  | 0,67           | 252           | 1      | 202,6         | 1,36 | 0,19      | 9,99  | 0,76         |
| MDC                  | Ref (Neutral) | 8337  | 1755   | 484,8         | 1,00 |           |      |                 | 1089  | 122    | 70,7          | 1,00 |           |       |                | 8337          | 1317   | 501,1         | 1,00 |           |       |              |
|                      | Resilient     | 339   | 64     | 19,1          | 0,92 | 0,71      | 1,18 | 0,50            | 27    | 1      | 1,8           | 0,32 | 0,04      | 2,27  | 0,25           | 339           | 59     | 19,8          | 1,05 | 0,81      | 1,37  | 0,70         |
|                      | Sensitive     | 345   | 90     | 19,3          | 1,32 | 1,07      | 1,64 | <b>9,40E-03</b> | 45    | 3      | 2,5           | 0,83 | 0,26      | 2,62  | 0,75           | 345           | 74     | 20,1          | 1,47 | 1,16      | 1,86  | <b>0,001</b> |
| HDL-C                |               |       |        |               |      |           |      |                 |       |        |               |      |           |       |                |               |        |               |      |           |       |              |
| VHU                  | Ref (Neutral) | 1855  | 90     | 1416,9        | 1,00 |           |      |                 | 1849  | 31     | 1413,3        | 1,00 |           |       |                | 1855          | 6      | 1416,9        | 1,00 |           |       |              |
|                      | Resilient     | 95    | 3      | 70,5          | 0,64 | 0,20      | 2,03 | 0,45            | 95    | 0      | 70,5          | -    | -         | -     | -              | 95            | 0      | 70,5          | -    | -         | -     | -            |
|                      | Sensitive     | 91    | 5      | 66,9          | 1,22 | 0,49      | 3,01 | 0,67            | 90    | 2      | 66,1          | 1,71 | 0,40      | 7,28  | 0,47           | 91            | 1      | 66,9          | 4,68 | 0,49      | 44,92 | 0,18         |
| MDC                  | Ref (Neutral) | 1515  | 329    | 94,1          | 1,00 |           |      |                 | 996   | 99     | 64,9          | 1,00 |           |       |                | 1513          | 236    | 96,8          | 1,00 |           |       |              |
|                      | Resilient     | 75    | 23     | 4,3           | 1,69 | 1,10      | 2,58 | <b>1,62E-02</b> | 44    | 6      | 2,3           | 2,22 | 0,96      | 5,12  | 0,06           | 76            | 13     | 4,7           | 1,39 | 0,79      | 2,44  | 0,25         |
|                      | Sensitive     | 62    | 11     | 3,7           | 1,07 | 0,59      | 1,96 | 0,82            | 44    | 1      | 2,9           | 0,22 | 0,03      | 1,61  | 0,14           | 63            | 7      | 3,9           | 0,98 | 0,46      | 2,08  | 0,96         |
| BMI                  |               |       |        |               |      |           |      |                 |       |        |               |      |           |       |                |               |        |               |      |           |       |              |
| VHU                  | Ref (Neutral) | 12951 | 423    | 10640,4       | 1,00 |           |      |                 | 12921 | 161    | 10621,1       | 1,00 |           |       |                | 13028         | 30     | 257075,9      | 1,00 |           |       |              |
|                      | Resilient     | 636   | 19     | 557,1         | 1,18 | 0,72      | 1,94 | 0,50            | 636   | 2      | 557,1         | 0,58 | 0,14      | 2,36  | 0,45           | 638           | 0      | 13024,7       | -    | -         | -     | -            |

| CVD               |               |       |        |               |      |           |      |                 | T2D   |        |               |      |           |      |      | CVD-mortality |        |               |      |           |       |              |
|-------------------|---------------|-------|--------|---------------|------|-----------|------|-----------------|-------|--------|---------------|------|-----------|------|------|---------------|--------|---------------|------|-----------|-------|--------------|
| Trait/study       | Categories    | n     | Events | *Person-years | HR   | 95% (CIs) |      | p               | n     | Events | *Person-years | HR   | 95% (CIs) |      | p    | n             | Events | *Person-years | HR   | 95% (CIs) |       | p            |
| MDC               | Sensitive     | 257   | 5      | 198,2         | 0,53 | 0,20      | 1,36 | 0,19            | 255   | 12     | 196,7         | 0,64 | 0,27      | 1,53 | 0,32 | 258           | 2      | 4940,0        | 0,93 | 0,12      | 7,01  | 0,95         |
|                   | Ref (Neutral) | 8217  | 1751   | 479,6         | 1,00 |           |      |                 | 1050  | 97     | 68,2          | 1,00 |           |      |      | 8217          | 1297   | 495,3         | 1,00 |           |       |              |
|                   | Resilient     | 399   | 61     | 23,0          | 1,04 | 0,79      | 1,37 | 0,77            | 56    | 5      | 3,8           | 2,74 | 1,00      | 7,42 | 0,05 | 399           | 68     | 23,4          | 1,57 | 1,20      | 2,06  | <b>0,001</b> |
|                   | Sensitive     | 401   | 105    | 22,0          | 0,99 | 0,77      | 1,27 | 0,94            | 44    | 8      | 2,3           | 0,54 | 0,20      | 1,43 | 0,21 | 401           | 91     | 23,1          | 1,22 | 0,93      | 1,61  | 0,15         |
| LDL-C             |               |       |        |               |      |           |      |                 |       |        |               |      |           |      |      |               |        |               |      |           |       |              |
| VHU               | Ref (Neutral) |       | 91     | 1447,2        | 1,00 |           |      |                 | 1914  | 38     | 1442,3        | 1,00 |           |      |      | 1921          | 7      | 1447,2        | 1,00 |           |       |              |
|                   | Resilient     | 68    | 4      | 49,8          | 1,52 | 0,56      | 4,18 | 0,41            | 67    | 1      | 49,0          | 0,82 | 0,11      | 5,99 | 0,84 | 68            | 1      | 49,8          | 2,92 | 0,33      | 25,77 | 0,34         |
| MDC               | Sensitive     | 114   | 12     | 90,8          | 2,17 | 1,17      | 4,02 | <b>1,34E-02</b> | 112   | 1      | 89,9          | 0,39 | 0,05      | 2,85 | 0,35 | 114           | 2      | 90,8          | 3,99 | 0,81      | 19,70 | 0,09         |
|                   | Ref (Neutral) | 1443  | 299    | 89,4          | 1,00 |           |      |                 | 942   | 109    | 60,6          | 1,00 |           |      |      | 1445          | 222    | 92,4          | 1,00 |           |       |              |
|                   | Resilient     | 98    | 24     | 6,0           | 1,32 | 0,87      | 2,00 | 0,20            | 68    | 4      | 4,4           | 0,54 | 0,20      | 1,48 | 0,23 | 95            | 16     | 6,0           | 1,26 | 0,75      | 2,09  | 0,38         |
|                   | Sensitive     | 91    | 25     | 5,3           | 1,58 | 1,05      | 2,39 | <b>2,87E-02</b> | 58    | 5      | 3,7           | 0,73 | 0,29      | 1,79 | 0,49 | 92            | 14     | 5,7           | 1,22 | 0,71      | 2,09  | 0,48         |
| Total Cholesterol |               |       |        |               |      |           |      |                 |       |        |               |      |           |      |      |               |        |               |      |           |       |              |
| VHU               | Ref (Neutral) | 12637 | 403    | 10425,3       | 1,00 |           |      |                 | 12610 | 150    | 10408,0       | 1,00 |           |      |      | 12637         | 27     | 10425,3       | 1,00 |           |       |              |
|                   | Resilient     | 651   | 14     | 523,3         | 0,78 | 0,46      | 1,33 | 0,37            | 649   | 9      | 522,4         | 1,18 | 0,59      | 2,36 | 0,63 | 651           | 2      | 523,3         | 1,74 | 0,41      | 7,40  | 0,45         |
|                   | Sensitive     | 466   | 39     | 405,2         | 2,23 | 1,60      | 3,10 | <b>2,00E-06</b> | 463   | 11     | 404,0         | 1,70 | 0,92      | 3,14 | 0,09 | 466           | 3      | 405,2         | 2,33 | 0,70      | 7,72  | 0,17         |
| MDC               | Ref (Neutral) | 1486  | 295    | 91,9          | 1,00 |           |      |                 | 975   | 105    | 63,2          | 1,00 |           |      |      | 1486          | 218    | 94,4          | 1,00 |           |       |              |
|                   | Resilient     | 92    | 26     | 5,5           | 1,70 | 1,13      | 2,54 | <b>1,04E-02</b> | 59    | 5      | 3,7           | 0,90 | 0,36      | 2,22 | 0,82 | 92            | 17     | 5,6           | 1,56 | 0,95      | 2,57  | 0,08         |
|                   | Sensitive     | 90    | 21     | 5,3           | 1,09 | 0,69      | 1,71 | 0,72            | 53    | 5      | 3,1           | 0,84 | 0,34      | 2,09 | 0,71 | 90            | 15     | 5,5           | 0,92 | 0,54      | 1,58  | 0,77         |
| Triglycerides     |               |       |        |               |      |           |      |                 |       |        |               |      |           |      |      |               |        |               |      |           |       |              |
| VHU               | Ref (Neutral) | 10498 | 330    | 8592,6        | 1,00 |           |      |                 | 10469 | 148    | 8574,8        | 1,00 |           |      |      | 10498         | 29     | 8592,6        | 1,00 |           |       |              |
|                   | Resilient     | 1     | 0      | 1,1           | -    | -         | -    | -               | 1     | 0      | 1,1           | -    | -         | -    | -    | 1             | 0      | 1,1           | -    | -         | -     | -            |
|                   | Sensitive     | 378   | 16     | 311,0         | 1,11 | 0,67      | 1,83 | 0,70            | 376   | 4      | 309,6         | 0,69 | 0,25      | 1,86 | 0,46 | 378           | 2      | 311,0         | 1,43 | 0,34      | 6,00  | 0,63         |
| MDC               | Ref (Neutral) | 1194  | 277    | 72,0          | 1,00 |           |      |                 | 767   | 80     | 48,3          | 1,00 |           |      |      | 1194          | 202    | 74,6          | 1,00 |           |       |              |
|                   | Resilient     | 68    | 17     | 4,2           | 1,09 | 0,66      | 1,78 | 0,75            | 41    | 0      | 2,7           | -    | -         | -    | -    | 68            | 10     | 4,3           | 0,84 | 0,44      | 1,59  | 0,58         |
|                   | Sensitive     | 72    | 16     | 4,2           | 1,02 | 0,61      | 1,69 | 0,94            | 41    | 5      | 2,3           | 1,51 | 0,60      | 3,81 | 0,38 | 72            | 15     | 4,4           | 1,39 | 0,82      | 2,36  | 0,22         |

| CVD         |               |        |        |               |      |           |      |                 | T2D    |        |               |      |           |      |      | CVD-mortality |        |               |      |           |       |                 |
|-------------|---------------|--------|--------|---------------|------|-----------|------|-----------------|--------|--------|---------------|------|-----------|------|------|---------------|--------|---------------|------|-----------|-------|-----------------|
| Trait/study | Categories    | n      | Events | *Person-years | HR   | 95% (CIs) |      | p               | n      | Events | *Person-years | HR   | 95% (CIs) |      | p    | n             | Events | *Person-years | HR   | 95% (CIs) |       | p               |
| SBP         |               |        |        |               |      |           |      |                 |        |        |               |      |           |      |      |               |        |               |      |           |       |                 |
| VHU         | Ref (Neutral) | 13021  | 408    | 10773,1       | 1,00 |           |      |                 | 12996  | 170    | 10757,8       | 1,00 |           |      |      | 13021         | 25     | 10773,1       | 1,00 |           |       |                 |
|             | Resilient     | 474    | 6      | 377,83        | 0,46 | 0,21      | 1,04 | 0,06            | 474,00 | 5,00   | 377,83        | 0,65 | 0,26      | 1,64 | 0,37 | 474,00        | 0,00   | 377,83        | -    | -         | -     | -               |
|             | Sensitive     | 201,00 | 10,00  | 162,55        | 1,63 | 0,87      | 3,05 | 0,13            | 200,00 | 5,00   | 161,41        | 1,74 | 0,71      | 4,24 | 0,22 | 201,00        | 1,00   | 162,55        | 2,48 | 0,33      | 18,46 | 0,37            |
| MDC         | Ref (Neutral) | 8236   | 1708   | 477,5         | 1,00 |           |      |                 | 1048   | 106    | 67,5          | 1,00 |           |      |      | 8236          | 1307   | 493,1         | 1,00 |           |       |                 |
|             | Resilient     | 357    | 61     | 21,1          | 0,87 | 0,68      | 1,13 | 0,30            | 45     | 4      | 3,0           | 0,87 | 0,32      | 2,40 | 0,79 | 357           | 56     | 21,6          | 1,01 | 0,77      | 1,32  | 0,93            |
|             | Sensitive     | 429    | 122    | 23,4          | 1,57 | 1,31      | 1,89 | <b>1,48E-06</b> | 51     | 9      | 3,1           | 1,59 | 0,80      | 3,17 | 0,19 | 429           | 94     | 24,8          | 1,53 | 1,24      | 1,88  | <b>7,87E-05</b> |

" - " it was not possible to estimate the number; † corresponds to VHU; \*Per 100,000 person-years; SBP: systolic blood pressure; DBP: diastolic blood pressure; HDL-C: High-density lipoprotein cholesterol; LDL-C: low-density lipoprotein cholesterol; BMI: Body mass index; HbA1c: glycated haemoglobin; CVD: Cardiovascular disease. T2D: Type 2 diabetes. Adjustment included age, sex, BMI, fasting status, FFQ version, TEI, educational level and smoking status, physical activity, and alcohol intake.

## Supplementary figure

Feature Importance Fasting glucose (visit 1)

Feature Importance Fasting glucose (visit 2)

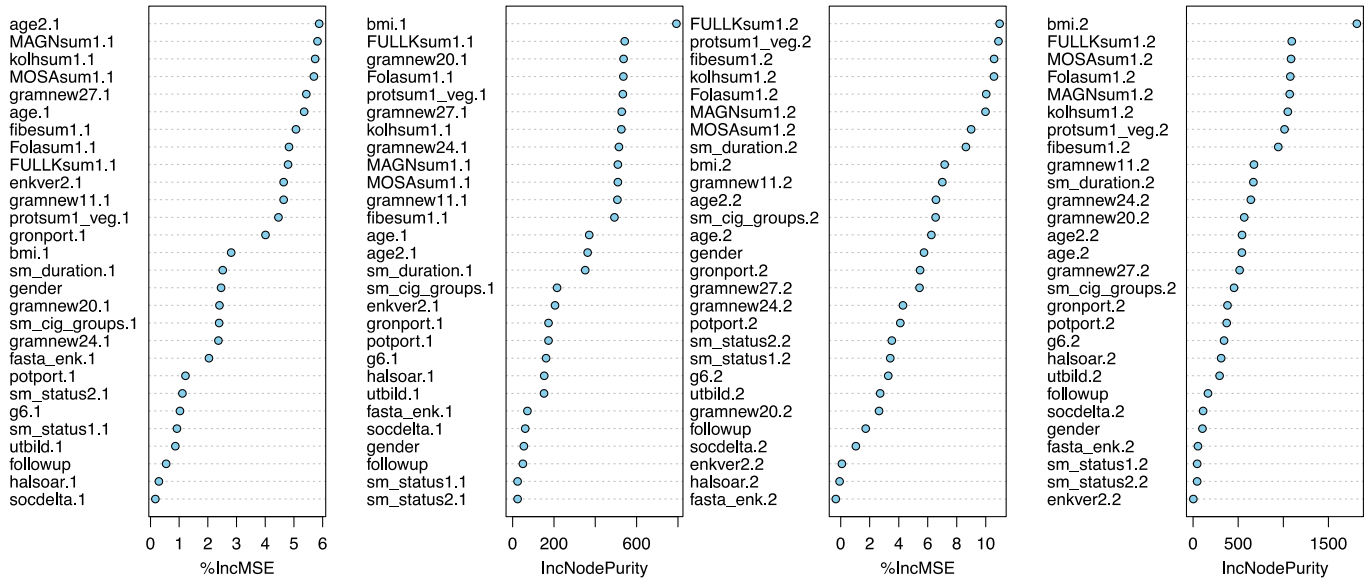

**Supplementary figure S1. Variable importance plot of fasting glucose (FG) model in VHU per visit.**

The x-axis shows each all model-variable. %IncMSE: percentage in mean square error is estimated upon mean decrease of accuracy in predictions with out-of-bag samples when each variable is excluded; IncNodePurity: increase in node purity is the total decrease of squared errors for each decision tree.

Feature Importance 2h glucose (visit 1)

Feature Importance 2h glucose (visit 2)

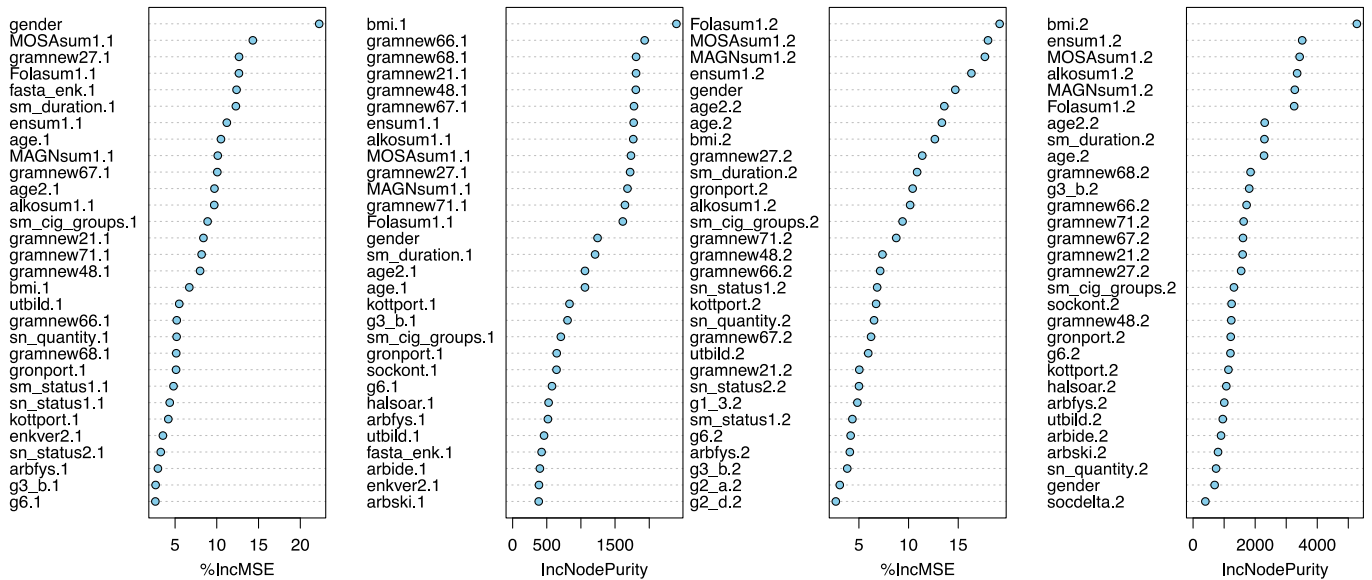

**Supplementary figure S2. Variable importance plot of 2-hour glucose (2hr G) model in VHU per visit.**

The x-axis shows each all model-variable. %IncMSE: percentage in mean square error is estimated upon mean decrease of accuracy in predictions with out-of-bag samples when each variable is excluded; IncNodePurity: increase in node purity is the total decrease of squared errors for each decision tree.

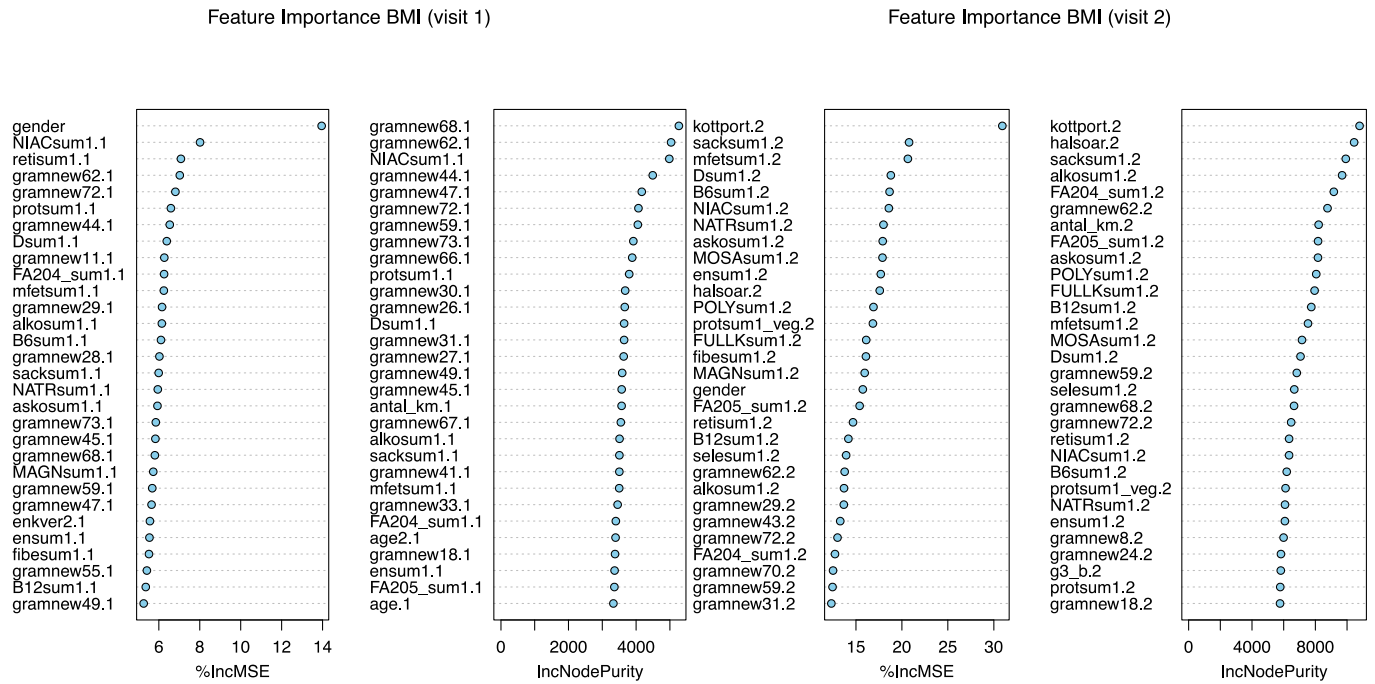

**Supplementary figure S3. Variable importance plot of body mass index (BMI) model in VHU per visit.**  
The x-axis shows each all model-variable. %IncMSE: percentage in mean square error is estimated upon mean decrease of accuracy in predictions with out-of-bag samples when each variable is excluded; IncNodePurity: increase in node purity is the total decrease of squared errors for each decision tree.

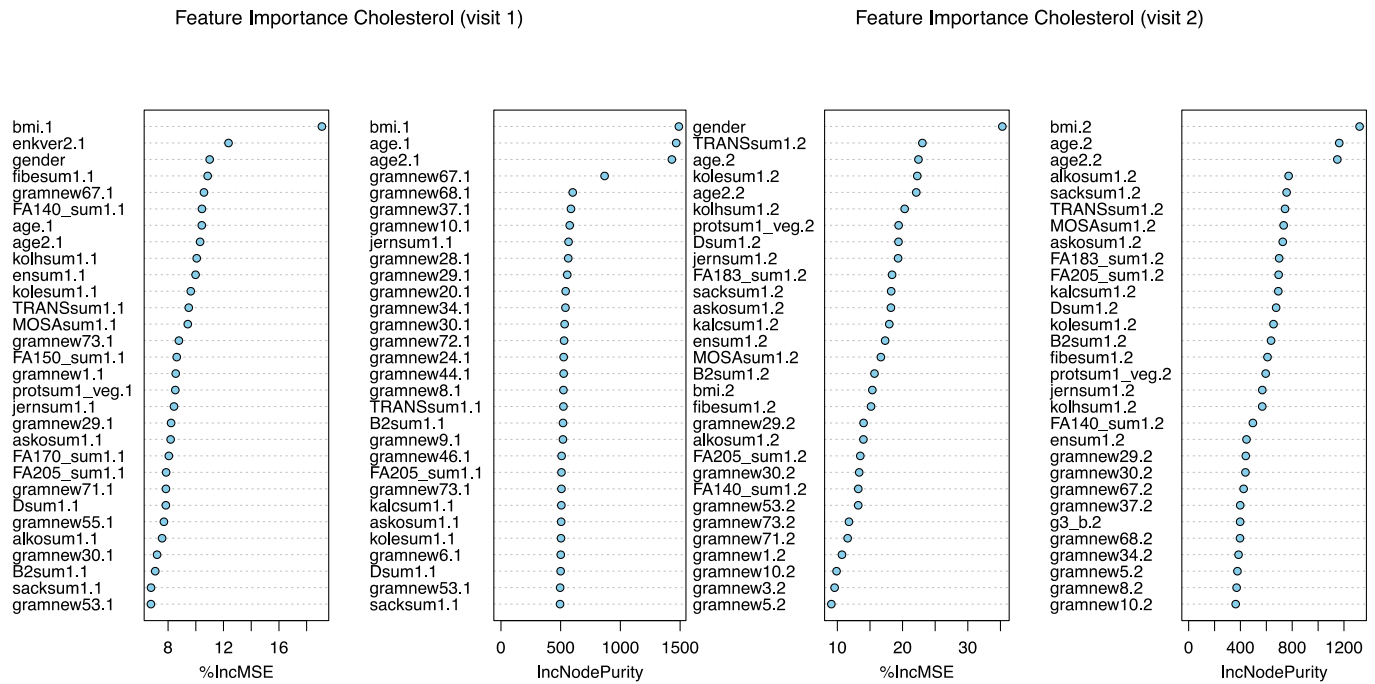

**Supplementary figure S4. Variable importance plot of Cholesterol (total cholesterol) model in VHU per visit.**  
The x-axis shows each all model-variable. %IncMSE: percentage in mean square error is estimated upon mean decrease of accuracy in predictions with out-of-bag samples when each variable is excluded; IncNodePurity: increase in node purity is the total decrease of squared errors for each decision tree.

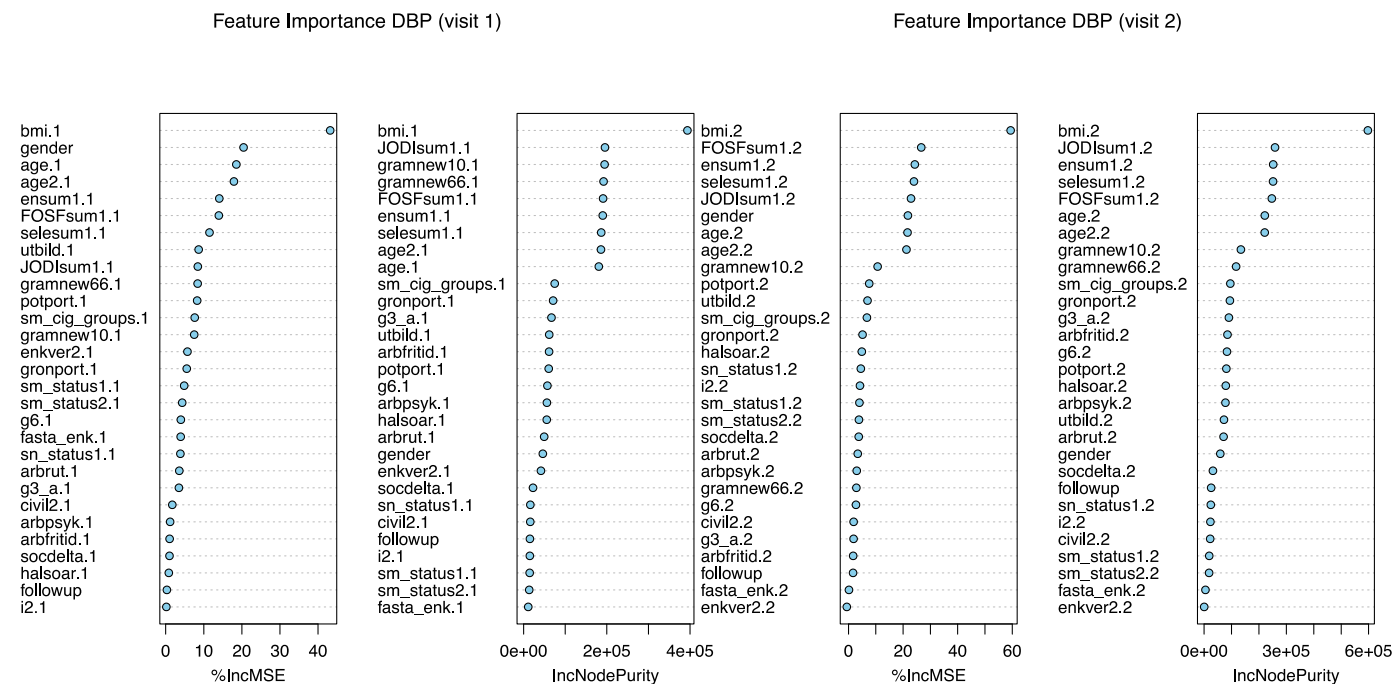

**Supplementary figure S5. Variable importance plot of diastolic blood pressure (DBP) model in VHU per visit.**

The x-axis shows each all model-variable. %IncMSE: percentage in mean square error is estimated upon mean decrease of accuracy in predictions with out-of-bag samples when each variable is excluded; IncNodePurity: increase in node purity is the total decrease of squared errors for each decision tree.

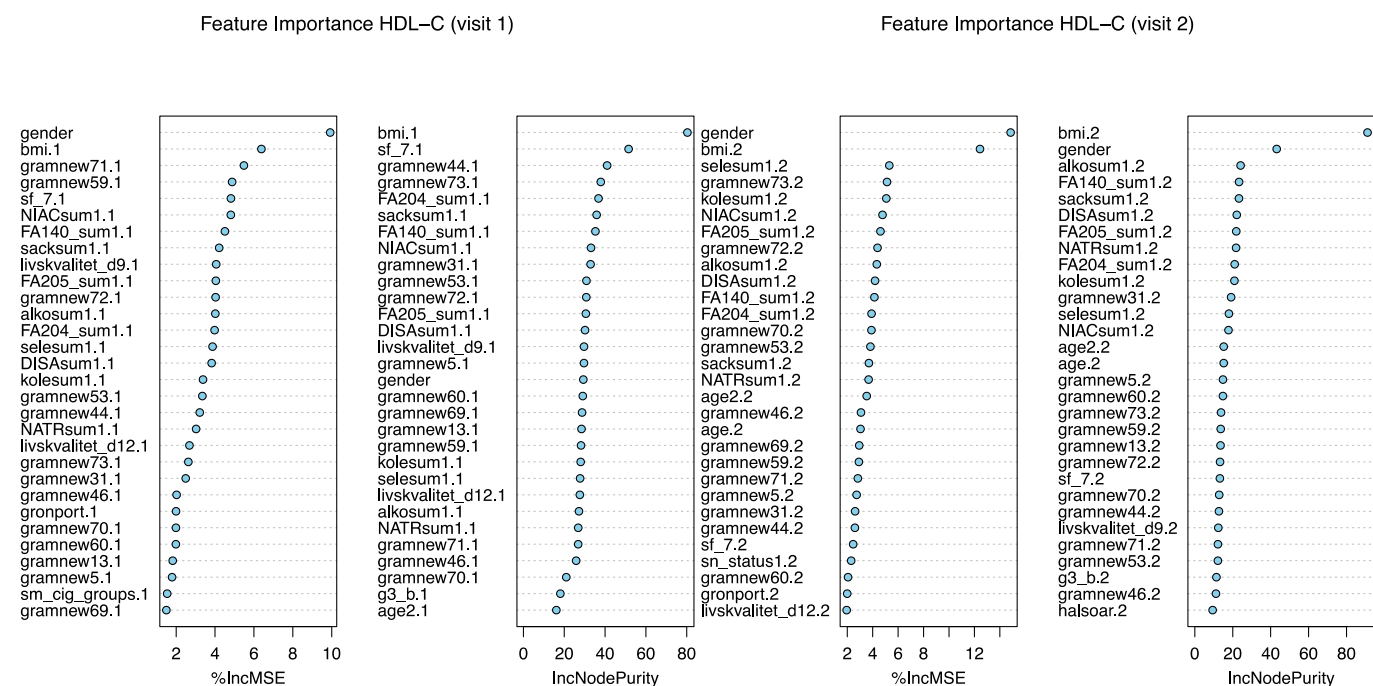

**Supplementary figure S6. Variable importance plot of high-density cholesterol (HDL-C) model in VHU per visit.**

The x-axis shows each all model-variable. %IncMSE: percentage in mean square error is estimated upon mean decrease of accuracy in predictions with out-of-bag samples when each variable is excluded; IncNodePurity: increase in node purity is the total decrease of squared errors for each decision tree.

### Feature Importance LDL-C (visit 2)

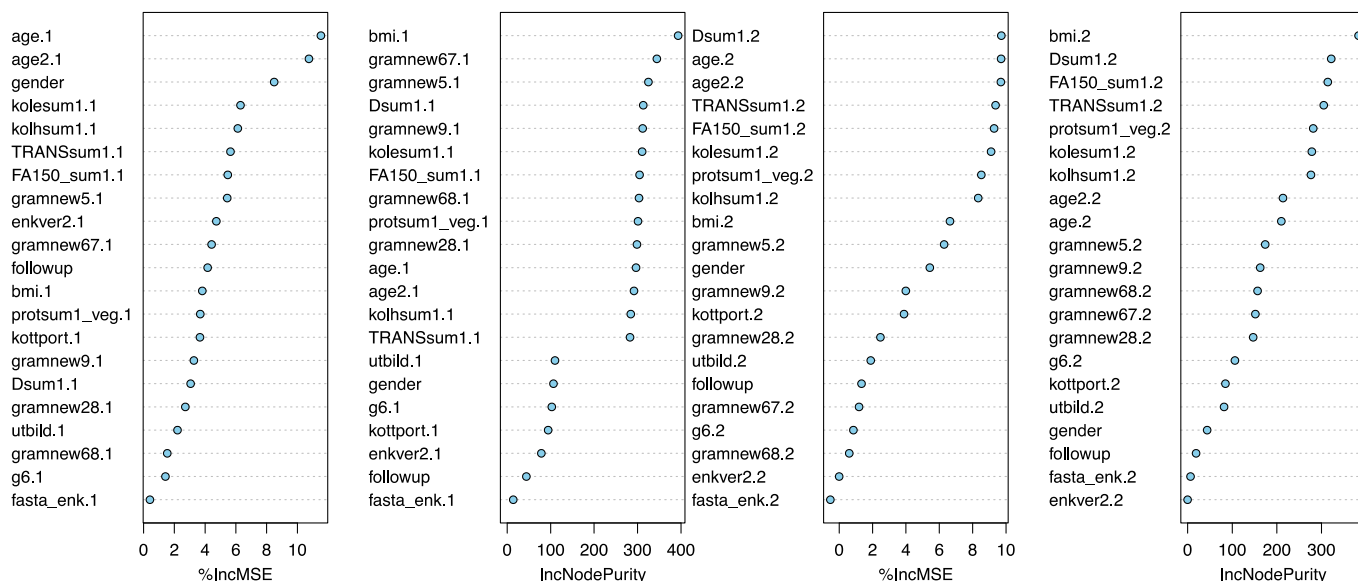

The x-axis shows each all model-variable. %IncMSE: percentage in mean square error is estimated upon mean decrease of accuracy in predictions with out-of-bag samples when each variable is excluded; IncNodePurity: increase in node purity is the total decrease of squared errors for each decision tree.

Feature Importance SBP (visit 2)

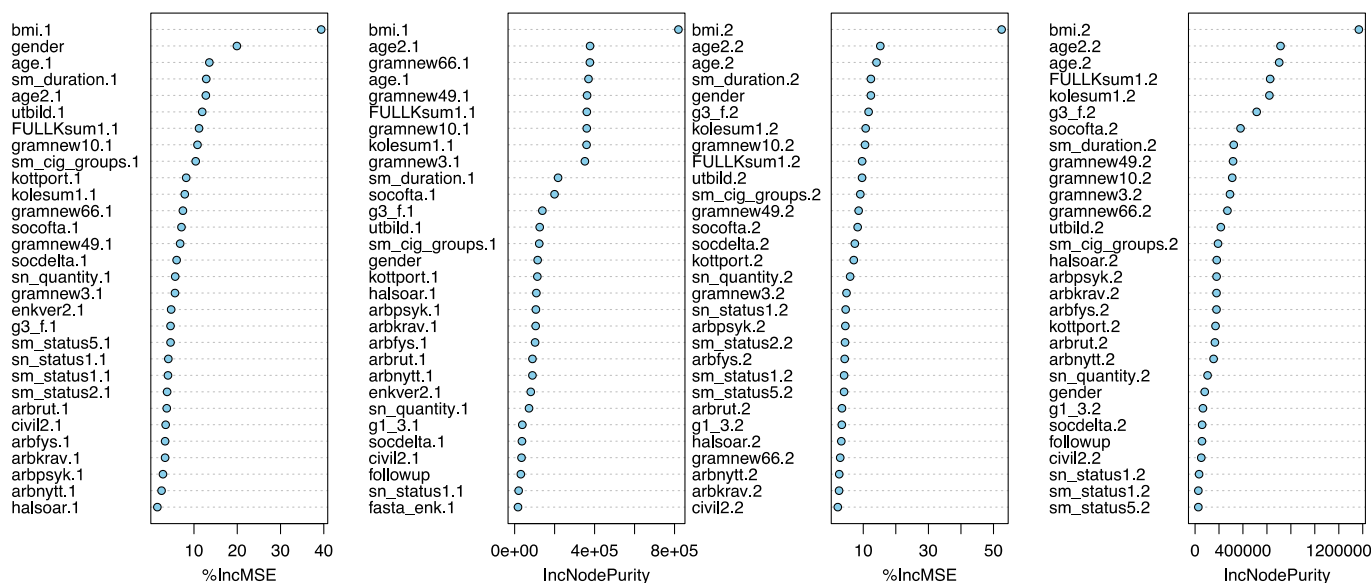

The x-axis shows each all model-variable. %IncMSE: percentage in mean square error is estimated upon mean decrease of accuracy in predictions with out-of-bag samples when each variable is excluded; IncNodePurity: increase in node purity is the total decrease of squared errors for each decision tree.

Feature Importance Triglycerides (visit 1)

Feature Importance Triglycerides (visit 2)

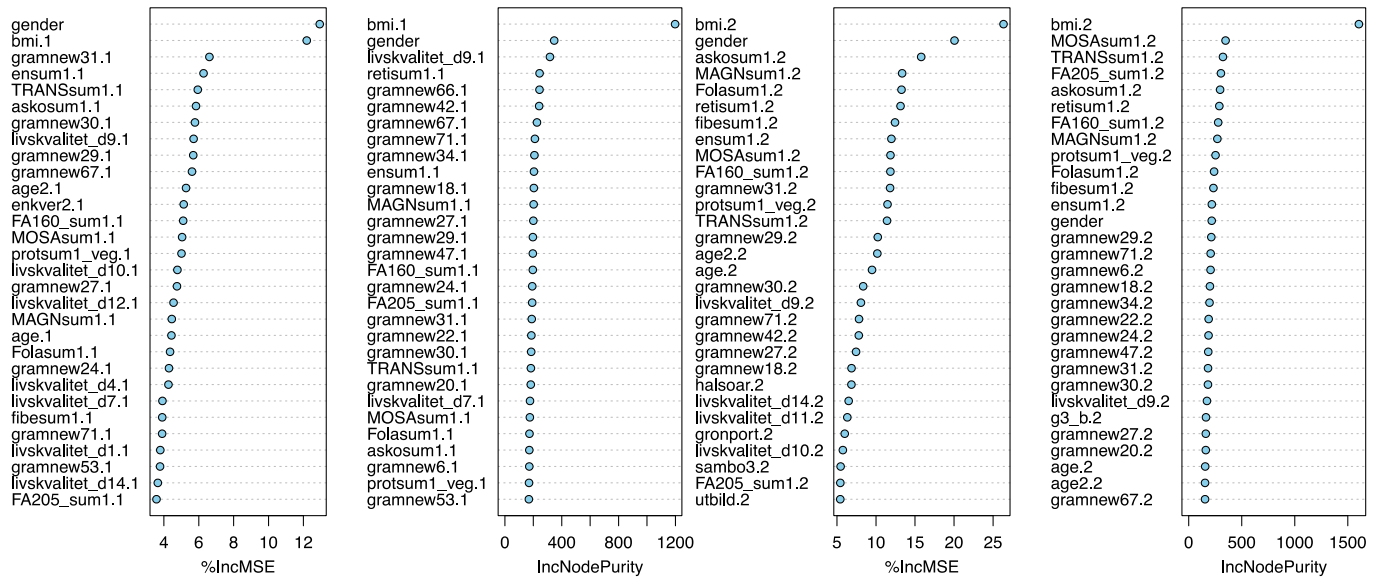**Supplementary figure S9. Variable importance plot of triglycerides model in VHU per visit.**

The x-axis shows each all model-variable. %IncMSE: percentage in mean square error is estimated upon mean decrease of accuracy in predictions with out-of-bag samples when each variable is excluded; IncNodePurity: increase in node purity is the total decrease of squared errors for each decision tree.
